# Supplementary material for: The bioinformatics and experimental analysis of the novel roles of virus infection-associated gene CDC20 for prognosis and immune infiltration in hepatocellular carcinoma
Source: publisher site journal article supplement (doi:10.18632/aging.204093), 2022-05-27
Supplement: Supplementary file [file aging-v14i10-204093-supplementary-material-SD1.pdf]

**SUPPLEMENTARY FIGURES**

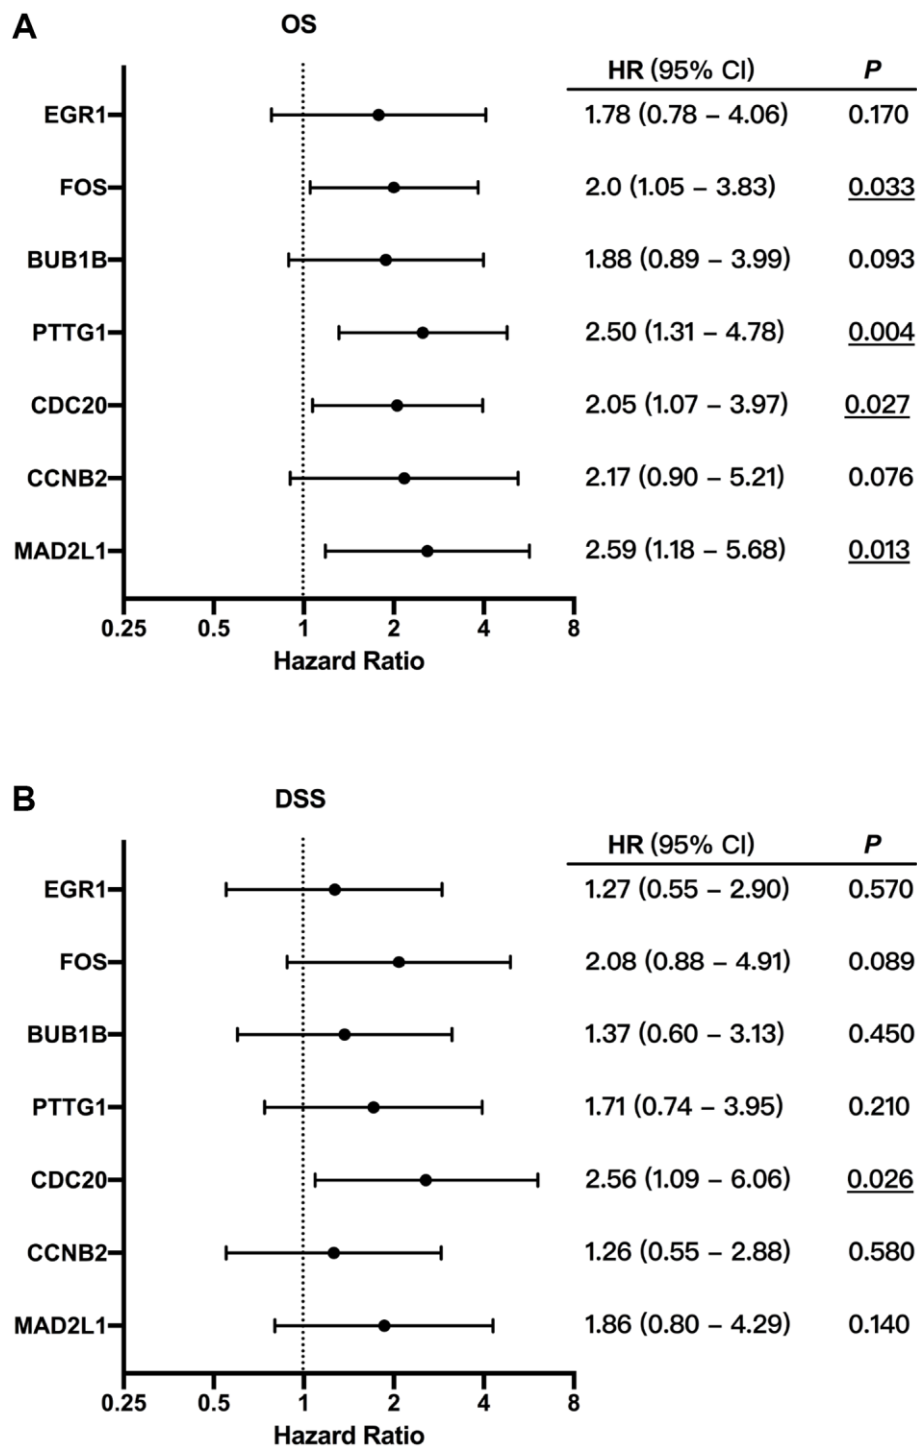

**Supplementary Figure 1.** (A and B) Forest plots exhibited the Kaplan-Meier analysis of Overall Survival (OS) and Disease Specific Survival (DSS) in patients with differential expression of each HTLV-1 associated gene.

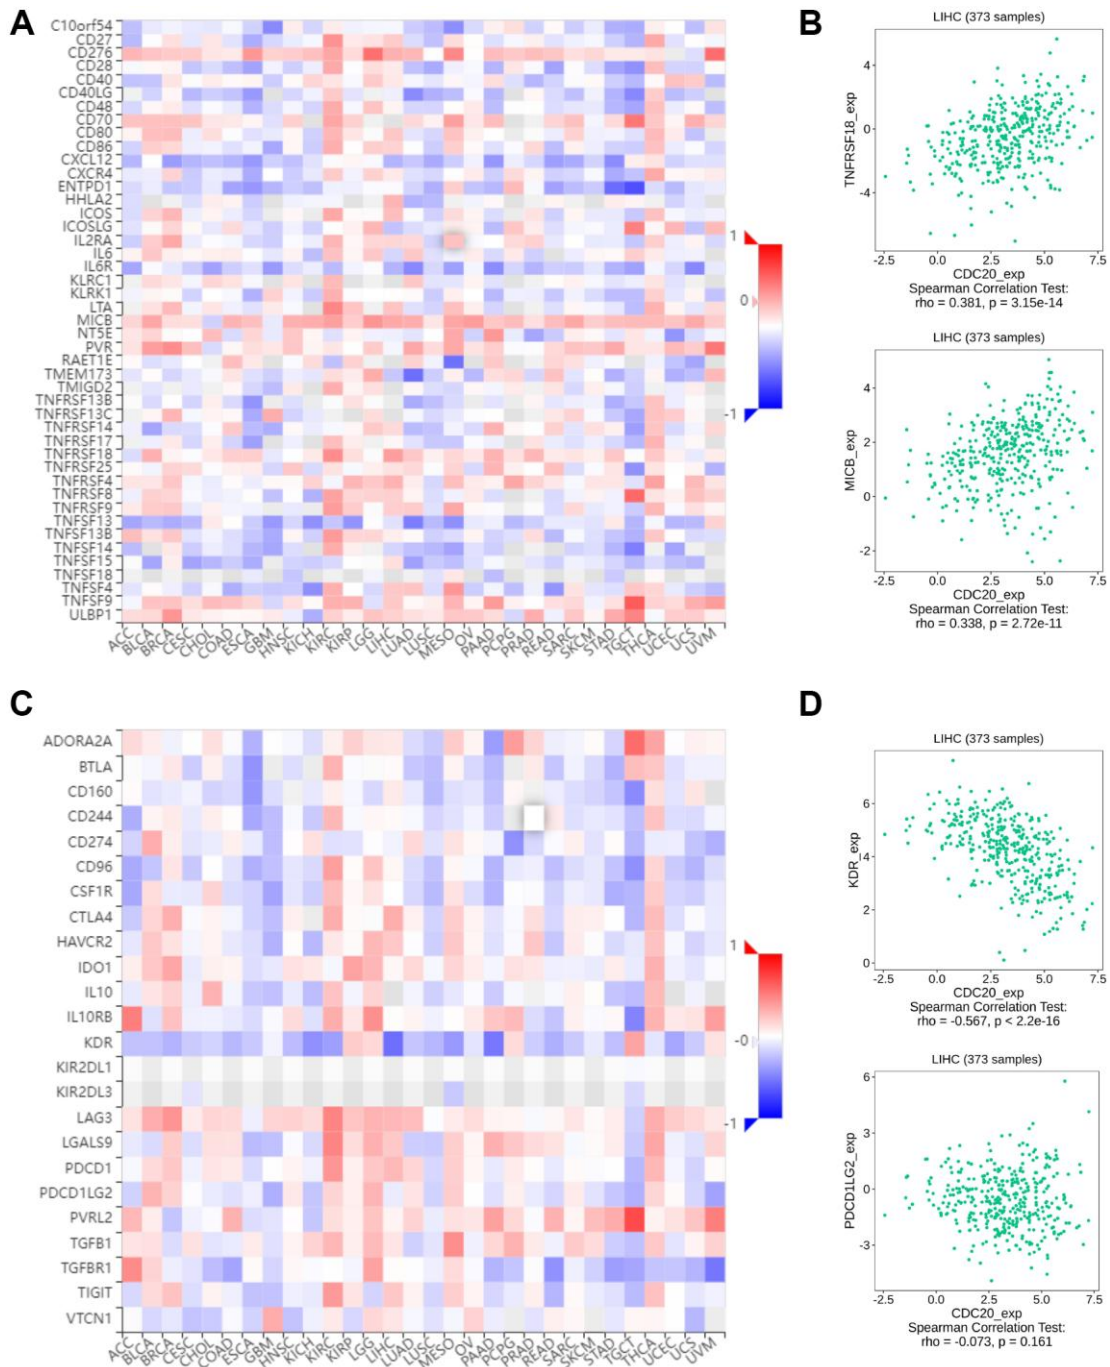

**Supplementary Figure 2. The correlation of CDC20 expression with the immunomodulators in HCC. (A)** The correlation between CDC20 expression and the immunostimulators in pan-cancer including hepatocellular carcinoma. **(B)** The top two immunostimulators with the highest relevance to CDC20. **(C)** The correlation between CDC20 expression and the immunoinhibitors in pan-cancer including hepatocellular carcinoma. **(D)** The top two immunoinhibitors with the highest relevance to CDC20.

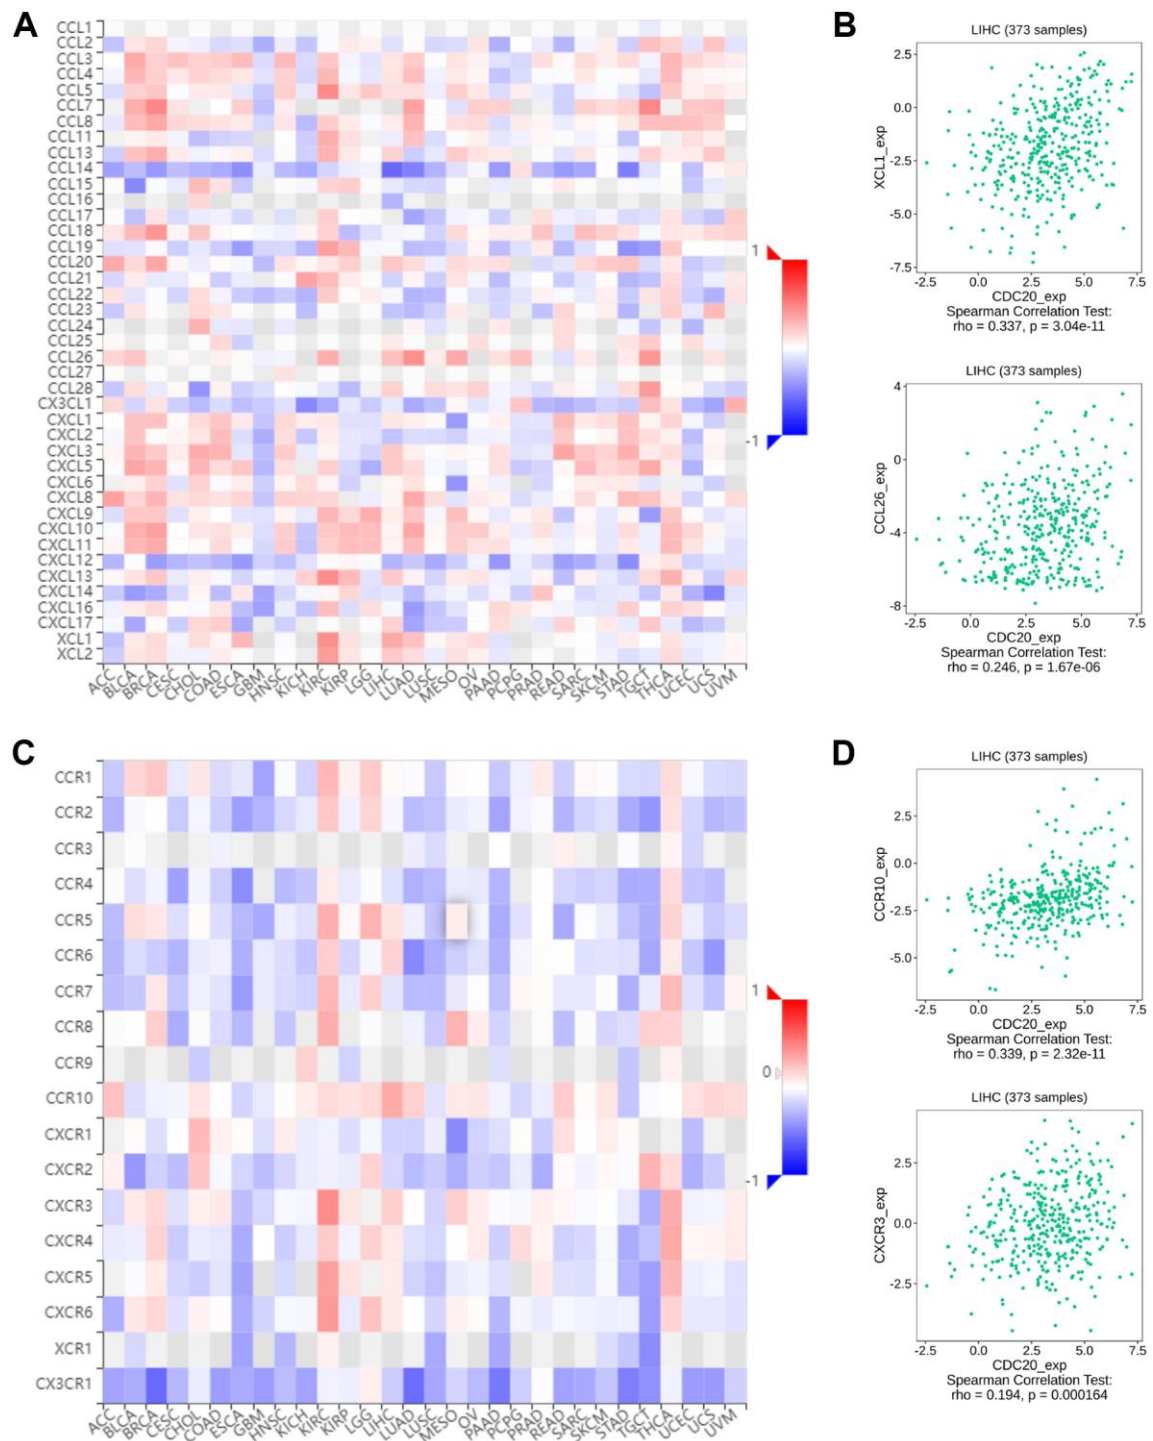

**Supplementary Figure 3. The correlation of CDC20 expression with the chemokines and chemokine receptors in HCC.** (A) The correlation between CDC20 expression and the chemokines in pan-cancer including hepatocellular carcinoma. (B) The top two chemokines with the highest relevance to CDC20. (C) The correlation between CDC20 expression and the chemokine receptors in pan-cancer including hepatocellular carcinoma. (D) The top two chemokine receptors with the highest relevance to CDC20.
