# Supplementary material for: The bioinformatics and experimental analysis of the novel roles of virus infection-associated gene CDC20 for prognosis and immune infiltration in hepatocellular carcinoma
Source: Aging (Albany NY). 2022 May 27;14(10):4513–29. doi: 10.18632/aging.204093 (PMC9186757; doi:10.18632/aging.204093)
Supplement: Supplementary Table 1 [file aging-14-204093-s002.xlsx]

## Sheet: GSE101685+UP
Supplementary Table 1. Up-regulated and down-regulated genes in four hepatocellular carcinoma GSE datasets.
TOP2A
ASPM
NEK2
CCNB1
NDC80
TTK
CDK1
ECT2
ZWINT
KIF20A
BUB1B
DLGAP5
NCAPG
MTFR2
CCNB2
RACGAP1
BUB1
DTL
NUF2
KIF4A
GINS1
ANLN
MKI67
CENPK
RRM2
PRC1
CDC20
CCNA2
CENPU
IQGAP3
CENPF
FAM72A///FAM72D///FAM72B///FAM72C
CDKN3
PBK
PRR11
DEPDC1
HMMR
HELLS
KIF14
E2F8
CDKN2C
MAD2L1
KIF2C
FEN1
AURKA
SGO2
STMN1
UBE2T
KIAA0101
MELK
RAD51AP1
EZH2
RFC4
PTTG1
UHRF1
DEPDC1B
FANCD2
OIP5
SPC25
TPX2
ATAD2
GTSE1
TRIP13
CDC6
SLC35F6///CENPA
CAP2
CENPL
CD24
GAS2L3
KIF11
FOXM1
FAM83D
GPC3
MCM2
EME1
CENPW
CCNE2
TDRKH
CCDC34
NUSAP1
CDKN2A
APOBEC3B
GPSM2
HIST1H3F///HIST1H3B///HIST1H3H///HIST1H3J///HIST1H3G///HIST1H3I///HIST1H3E///HIST1H3C///HIST1H3D///HIST1H3A
TUFT1
BIRC5
CDC7
H2AFX
TYMS
MCM6
FANCI
HIST1H2BJ///HIST1H2BG
CDCA3
FLVCR1
KPNA2
LOC101930489///MIR4435-2HG///LINC00152
COL15A1
ASRGL1
KIF23
MICB
UBD///GABBR1
CRNDE
SPINK1
CKS2
LOC100509445///LOC728715///OVOS///OVOS2
PSPH
CEP55
IGF2BP3
DUXAP10
LRRC1
CKAP2
DNAJC6
MCM8
ENAH
E2F7
CLGN
CTHRC1
B3GNT5
HIST1H2AH///HIST1H2AG///HIST1H2AM///HIST1H2AL///HIST1H2AK///HIST1H2AI
PLCB1
GMNN
CD109
GJC1
MDK
EPPK1
SULT1C2
RPS4Y1
DDX3Y
AKR1B10
SFN
RBM24
ELOVL7
SPP1
ACSL4
STXBP6
TRIM71
COCH
NEB
XK
TSPAN8
MMP12
PRKAA2
PEG10
KDM5D
EIF1AY
CDCA7
CCL20
C12orf75
BEX2
SLC44A5
ROBO1
NQO1
LINC01419
C15orf48
SSX1
ZNF595
DKK1
EPCAM
MAGEA12
SSX4B///SSX4
MAGEA6///MAGEA3
FAM3B
MAGEA6
S100P

## Sheet: GSE112790+UP
up-regulated genes in GSE112790
CAP2
CDKN2C
RFX5
NUSAP1
RACGAP1
HSPB1
KNL1
PLVAP
CDK1
ASPM
RRM2
ZWINT
UBD///GABBR1
DTL
CKAP2
HMMR
LOC101930489///MIR4435-2HG///LINC00152
AURKA
CENPU
ENAH
KIAA0101
COL4A1
PRC1
GINS1
FLVCR1
FAM83D
NDC80
CCDC34
GMNN
MCM6
ROBO1
CCNB1
ECT2
COL15A1
IQGAP3
CENPW
CDKN3
UBE2T
PRR11
CCNB2
COL4A2
TOP2A
PODXL
PTTG1
CENPF
NEK2
RAD51AP1
PLXNC1
MAD2L1
MELK
ANLN
DTNA
BUB1B
HELLS
PBK
EZH2
FAM72A///FAM72D///FAM72B///FAM72C
BIRC5
TTK
KIF4A
SQLE
CCNA2
CDC20
CENPK
UHRF1
SGO2
AKR1B10
COL1A1
NCAPG
KIF20A
COL1A2
DLGAP5
CRNDE
RBM24
STXBP6
EDIL3
GPC3
MDK
TYMS
MAP2
DNAJC6
ZIC2
SLC35F6///CENPA
BCAT1
ACSL4
NUF2
CXCL10
PLCB1
PRKAA2
CD109
DUXAP10
HKDC1
SULT1C2
SPINK1
APOBEC3B
STK39
CTHRC1
C12orf75
SOX4
SOX9
TRIM16
CCL20
CD24
SPP1
FGF13
IGF2BP3
COCH
SFN
NQO1
PDZK1IP1
IFI27
LGALS4
COX7B2
SSX1
KRT23
LINC01419
PEG10
MAGEA6///MAGEA3
MAGEA6
REG3A

## Sheet: GSE45267+UP
up-regulated genes in GSE45267
RACGAP1
ECT2
ASPM
CENPW
NUSAP1
PRR11
NEK2
CCNB1
NDC80
GINS1
TTK
PRC1
PTTG1
CDKN3
CENPF
HMMR
CDK1
GMNN
CCNB2
DTL
AURKA
ANLN
TOP2A
RFC4
BUB1B
SGO2
EZH2
BIRC5
NCAPG
FLVCR1
MELK
KIAA0101
ZWINT
CENPU
HELLS
KIF4A
RAD51AP1
RRM2
FAM72A///FAM72D///FAM72B///FAM72C
GPC3
PBK
MAD2L1
KIF20A
CDC20
CKS2
NUF2
UBE2C
UHRF1
CHML
CDKN2C
CCNE2
CAP2
GTSE1
DLGAP5
PSPH
COL15A1
FAM83D
PEG10
PRKAA2
CRNDE
SULT1C2
SPINK1
MDK
B3GNT5
EPPK1
ACSL4
HIST1H2BJ///HIST1H2BG
CD24
BEX2
CLGN
SFN
CTHRC1
CD109
COCH
IGF2BP3
DUXAP10
AKR1B10

## Sheet: GSE84402+UP
up-regulated genes in GSE84402
CCNB1
CDKN3
MKI67
CCNB2
CDCA5
ASPM
TROAP
CDCA8
UBE2C
TOP2A
UBE2T
MTBP
GPSM2
BIRC5
HJURP
FAM83D
MDK
CENPE
OIP5
KIF4A
CDK1
FAM72A///FAM72D///FAM72B///FAM72C
TTK
ANLN
CENPF
NCAPG
PBK
PTTG1
CHEK1
AURKA
RACGAP1
DEPDC1
GPC3
NUF2
PRC1
GINS1
GMNN
NT5DC2
RRM2
FANCI
COLCA2
CDC25A
MELK
KIF23
NEK2
MCM10
CDC6
AURKB
SNORD88C///C19orf48
CKS2
IGF2BP2
KIF18B
CDC20
IQGAP3
KIFC1
NDC80
BUB1
TPX2
DLGAP5
ECT2
HMMR
CDT1
FANCD2
MCM4
RECQL4
LMNB2
KIF20A
SULT1C2
RAD51AP1
POLQ
IGF2BP3
SKA1
UBE2S
CENPK
FEN1
DTL
DUXAP10
FOXM1
SLC6A8
OSR2
HELLS
FLVCR1
TYMS
CAP2
LAPTM4B
GTSE1
SPC25
KIF11
MAD2L1
TMEM246
UHRF1
LRRC69
DTNA
ESM1
CDCA3
GAL3ST1
LOC101927699
KIAA0101
SBF2-AS1
MCM6
PARPBP
MMP12
NCAPH
LINC01296///DUXAP10///DUXAP8
LOC729680
SBSN
PRR11
BUB1B
MIR3658///UCK2
ACSL4
SQLE
DEPDC1B
FAM64A
GDF11
TIAM2
TRIM71
TACC3
TK1
NANOS1
LOC654342///LOC645166
PEG10
KIF15
RMI2
CRNDE
E2F8
GIT2
CAMKMT
NSUN7
ROBO1
CCDC138
SLC35F6///CENPA
CDKN2A
ZIC2
BYSL
TRIP13
CD24
ZFP69B
HAGLR
PTTG3P
CTHRC1
P3H4
RRP12
CKAP2
MATR3
MMP11
CDCA7
LOC102725116
PLEKHB2
SNX5
KIF18A
ZNF883
UTP23
MIF-AS1
NETO2
CENPM
CENPO
LOC105373150
C3orf14
ASNS
SOX4
DBN1
PLEKHG2
CA12
MYBL2
HS6ST2
FAM19A4
SPC24
ITGA2
FBXL21
B3GALNT1
CTNND2
MEP1A
GNG4
ARFGEF3
ISX
NRXN3
CCNA2
LOC284926
LINC00665
SOAT2
WHSC1
MIR7112///BOP1
PHF19
LOC100129917
SNORA11E///SNORA11D///MAGED4///MAGED4B
TUBB2B
RBM24
GAGE12D///GAGE8///GAGE12F///GAGE2A///GAGE12H///GAGE12E///GAGE12B///GAGE12C///GAGE2D///GAGE12J///GAGE12G///GAGE13///GAGE2E///GAGE12I///GAGE7///GAGE6///GAGE5///GAGE4///GAGE2C///GAGE1
COCH
SPINK1
TREM2
IGDCC4
GNAL
UPK3A
EPPK1
ZNF681
HMGA2
SSUH2
CCL20
GAGE12D///GAGE8///GAGE12F///GAGE2A///GAGE12H///GAGE12E///GAGE12B///GAGE12C///GAGE2D///GAGE12J///GAGE12G///GAGE13///GAGE2B///GAGE2E///GAGE12I///GAGE7///GAGE6///GAGE5///GAGE4///GAGE3///GAGE2C///GAGE1
COL11A1
GAGE12D///GAGE12F///GAGE2A///GAGE12H///GAGE12E///GAGE12B///GAGE12C///GAGE12G///GAGE12I///GAGE7///GAGE6///GAGE5///GAGE4///GAGE2C
ZNF595
GAGE12D///GAGE12F///GAGE12H///GAGE12E///GAGE12B///GAGE12C///GAGE2D///GAGE12J///GAGE12G///GAGE13///GAGE12I///GAGE7///GAGE6///GAGE5///GAGE4///GAGE1
CT45A8///CT45A9///CT45A10///CT45A7///CT45A2///CT45A1///CT45A6///CT45A5///CT45A3
GAGE3
GAGE12F///GAGE12B///GAGE12G///GAGE12I///GAGE7///GAGE6///GAGE5///GAGE4

## Sheet: GSE101685+DOWN
down-regulated genes in GSE101685
CLEC4M
CLEC4G
LINC01093
ECM1
CLEC1B
STAB2
VIPR1
FCN2
LYVE1
BCO2
RSPO3
KCNN2
CFP
OIT3
KAZN
CCBE1
CXCL14
ESR1
FCN3
TTC36
ADGRG7
MARCO
ANGPTL1
CNDP1
HHIP
IGFALS
CPEB3
MOGAT2
CYP26A1
SLC25A47
CRHBP
FAM65C
SORL1
SPG20
FAM134B
SNORA28///EIF5
MASP1
MRO
CTNNA3
HGFAC
ADCY1
EXPH5
CETP
CYP2C19
IL1RAP
KBTBD11
SRPX
LIFR
CYP39A1
DIRAS3
DCN
EXOSC7///CLEC3B
RBMS3
RCAN1
AADAT
KDM8
KMO
DNASE1L3
LCAT
MAGI2-AS3
CCL15-CCL14///CCL14
CD5L
AVPR1A
PZP
NTN4
RCL1
CPED1
ADH1B
LPA
FOXO1
HAMP
NAT2
LOC105378749
SYNPO2
CYP4A11
GSTZ1
MBNL2
IDO2
C8orf4
ADGRA3
NR3C2
HEPN1///HEPACAM
NPY1R
HGF
CYP4A22///CYP4A11
IYD
ITGA9
HBA2///HBA1
TIMD4
THBS1
PLAC8
ANXA10
GBA3
SLC9B2
CD1D
GLYAT
IGFBP3
HBB
XIST
CYP3A4
CXCL2
GPD1
CXCL12
CYP2B6
PDE11A
KCND3
ST3GAL6
FAM13A
OLFML3
FTCD
MROH2A
FCGR2B
CYP4V2
ZGPAT
C7
PDLIM5
GPM6A
ADRA1A
DPT
MYO10
TUBE1
CYP2B7P
RND3
SOCS2
MS4A6A
CYP1A2
EPB41L4B
GADD45B
GHR
CCDC71L
IL33
SLCO1B3
RNF125
CYP2A7
LOC101928916///NNMT
CLRN3
THRSP
ZGPAT///LIME1
ID1
FOSB
LOC100287413///GLYATL1
ARHGEF26
MFAP3L
ASCL1
GYS2
SRD5A2
C3P1
SORBS2
ASPA
FOLH1B
GREM2
SLC3A1
EGR1
N4BP2L1
PLGLB1///PLGLB2
ART4
AKR1D1
FOLH1B///FOLH1
CYP2A6
ACADL
KLKB1
MIR99AHG
CYP3A43
S100A8
NAMPT
MFSD2A
CFHR3
DEPDC7
ADAMTSL3
FAM149A
CYP2B7P///CYP2B6
RDH16
TSLP
FOS
MAN1C1
ADH6
MCC
TAT
STEAP3
APOF
MRC1
HAO2
ASPN
IGF1
BBOX1
GCH1
FHL1
GADD45G
C9
BGN
ADH1C
PRG4
SPIDR
ADH4
CEBPD
SLC22A1
COLEC11
TFPI2
CNTN3
APOA5
TMEM27
BCHE
MME
C1orf168
RORA
EDNRB
LY6E
MT1G
ACSM3
GPAT3
PLPP3
SRD5A1
PGLYRP2
TMEM47
CDO1
SLC25A18
ACSL1
CIDEB
HOGA1
LOC101927331
TDO2
CFHR4
XDH
CTH
ARRDC4
GNMT
C6
LINC00844
UGP2
PBLD
PDGFRA
CD14
PDK4
STEAP4
ZBTB16
FBP1
FLJ22763
ATF5
CDH19
COL14A1
GLS2
OGDHL
CYP2C9
ACSM5
SERPINE1
ANK3
SULT1E1
MT1E
LOC100505985
ADH1A
C8A
PCK1
MT1F
SLC4A4
FST
CYP2C8
CFI
SLC46A3
SLC38A2
CA2
NPC1L1
AFM
C8B
PPARGC1A
UPB1
SAA2-SAA4///SAA4
TRPM8
DUSP1
CP
HPGD
SLC7A2
HLF
ALDOB
SAMD5
MT1X
PLG
MT1H
ERRFI1
LINC01018
DMGDH
SLC1A1
MT1M
IGFBP1
DNAJC12
NR1I2
GSPT2
CYP4F2
HPX
ANO1
ITIH4
SLC27A5
F9
LUM
AR
OAT
CYP2E1
HAL
SOX6
CYP3A7-CYP3A51P
CYP4F2///CYP4F3
SDS
SLC10A1
MT1HL1
SLCO1B1
CYP8B1
ALDH1L1
IL13RA2
ETNPPL
LINC01554
SPP2
CAT
SERPINA4
SLC13A5
AASS
ABCA8
HSD11B1
MT2A
TENM1
SAA2///SAA1
MBL2
BHMT
VNN1
APOC4-APOC2///APOC4///APOC2
HPR
UPP2
HPD
FMO3
TTR
IGHA2///IGHA1///IGH
G6PC
AOX1
WDR72
ACSM2B///ACSM2A
SLC38A4
LECT2
ZNF385B
INS-IGF2///IGF2
JCHAIN
SLC1A2
CRP
C1S
MIR675///H19
PLG///LPA
FGB
HSD17B6
RELN
DEFB1
ALB
LOC100507389
SERPINC1

## Sheet: GSE112790+DOWN
down-regulated genes in GSE112790
CYP2C19
CLEC4M
CLEC4G
FCN2
PZP
KCNN2
CLEC1B
LINC01093
CXCL14
ECM1
CFHR3
IL1RAP
EPHB1
FOSB
OIT3
IGFALS
CRHBP
CNDP1
ADRA1A
SERPINE1
HHIP
FCN3
MARCO
KBTBD11
CYP26A1
CYP2B6
CXCL2
ADGRG7
AADAT
LYVE1
GPM6A
LPA
CYP1A2
ALDH6A1
BCO2
SORL1
ASPA
TTC36
LCAT
MT1F
EGR2
PLGLB2
HAMP
RCAN1
RND3
PLIN1
MT1M
FOS
KCND3
IDO2
CYP4A11
CPEB3
TUBE1
TMEM27
LIFR
RSPO3
NR5A2
MFSD2A
PPID
CETP
APOF
SLC25A47
MAGI2-AS3
MT1G
SOCS2
HGFAC
NAT2
MAN1C1
GREM2
KMO
AVPR1A
ACSM3
CYP39A1
MBNL2
ID2B///ID2
DNASE1L3
FBP1
GADD45B
GSTZ1
SRD5A2
EPB41L4B
MT1H
PLAC8
ANXA10
ESR1
LY6E
MT1X
MT1HL1
TJP2
FOLH1B
MT1E
C8orf4
CYP2C9
APOA5
HGF
HBA2///HBA1
GLYAT
IGFBP3
FLJ22763
SPIDR
ZG16
NAMPT
HBB
TSLP
FAM134B
PBLD
MT2A
CYP4A22///CYP4A11
CXCL12
HAO2
CYP3A4
GNMT
CEBPD
FTCD
SLCO1B3
PHLDA1
MASP2
GLS2
SLC7A2
C8A
FOLH1B///FOLH1
PLGLB1///PLGLB2
IGF1
LINC01554
SULT1E1
GBA3
CYP3A43
CLRN3
C3P1
CYP2A7
LINC00844
BCHE
LOC101928916///NNMT
DNAJC12
S100A8
SRPX
MCC
SMIM24
CYP2B7P///CYP2B6
GHR
RDH16
GSPT2
DMGDH
CYP2A6
GYS2
SLC22A1
CTH
VNN1
AASS
OAT
MFAP3L
FXYD1
EGR1
PLG
MOGAT2
G6PC
LOC100287413///GLYATL1
C9
PGLYRP2
HAL
AFM
DCN
PRG4
LOC100129518///SOD2
ACADL
AKR1D1
C6
ADH1B
SLC38A4
ALDOB
SDS
ADH4
CNTN3
MIR675///H19
PCK1
CFHR4
BBOX1
HEPN1///HEPACAM
ATF5
HPGD
WDR72
BHMT
SPP2
EXPH5
C7
SLC1A1
PDGFRA
ABCA8
CYP2C8
INS-IGF2///IGF2
TMEM45A
IGHA2///IGHA1///IGH
MME
CYP2E1
F9
SLC10A1
CRP
SLC1A2
CYP8B1
SAA2-SAA4///SAA2///SAA1
LECT2
SLC3A1
HPD
HSD11B1
THRSP

## Sheet: GSE45267+DOWN
down-regulated genes in GSE45267
CLEC1B
FCN2
CLEC4G
HHIP
OIT3
FCN3
CLEC4M
STAB2
CNDP1
ECM1
CXCL14
CRHBP
RSPO3
LINC01093
LYVE1
CFP
CDHR2
BCO2
MARCO
NAT2
GPM6A
PLAC8
IDO2
CD5L
LPA
LCAT
TTC36
MASP1
CETP
LIFR
HGF
CPEB3
AADAT
ACSM3
GBA3
STEAP3
HAMP
CYP39A1
CYP26A1
FLJ22763
ASPA
MS4A6A
CXCL12
NPY1R
MFSD2A
IGF1
FAM65C
ADGRG7
DNASE1L3
CYP2B6
MT1F
MBNL2
GSTZ1
ESR1
SLC25A47
CDC37L1
GLYAT
APOF
DCN
GPD1
SRPX
IGFBP3
LOC101928916///NNMT
CYP1A2
MT1G
CYP2B7P///CYP2B6
EXPH5
SLC22A1
FAM13A
CYP2C8
PALM2
SERPINE1
RND3
MT1H
ADH6
MT1X
MAGI2-AS3
MOGAT2
OLFML3
C9
THBS1
CYP4A11
HGFAC
LOC100287413///GLYATL1
CIDEB
AFM
ADH1B
CXCL2
C3P1
CYP2C19
CYP3A4
CDH19
FOS
MT1E
ANG
SOCS2
TMEM27
MT1HL1
MT2A
THRSP
KMO
C6
KCNN2
SRD5A2
CFI
FCGR2B
HAO2
IL1RAP
CYP2A6
CLRN3
MT1M
CYP4A22///CYP4A11
C8orf4
PLG
AGXT2
ZG16
CYP2C9
CD14
ID1
CYP2A7
LY6E
FOSB
PLGLB1///PLGLB2
FOLH1B
RDH16
HPX
C8A
CFHR4
STEAP4
GHR
PGLYRP2
PBLD
GYS2
ITIH4
CFHR3
PLG///LPA
BBOX1
FBP1
CPED1
C7
MCC
CYP3A43
LINC00844
SAA2-SAA4///SAA4
ADH4
HBA2///HBA1
AZGP1P1///AZGP1
IL13RA2
TENM1
CYP2C18
ADH1C
ADRA1A
DEPDC7
HBB
GLS2
FAM134B
XDH
ANXA10
CD163
AKR1D1
SLCO1B3
IGHM
EGR1
TTR
CYP2B7P
SLC17A2
CA2
ADH1A
ACSL1
CTH
F9
SLC27A5
IGHA2///IGHA1///IGH
SLC10A1
GNMT
ACSM5
JCHAIN
ALDOB
APOA5
SPP2
MFAP3L
HPR
ETNPPL
CYP2E1
TDO2
FETUB
HPD
PDGFRA
FGB
CYP8B1
ACSM2B///ACSM2A
HSD17B6
IGKC
SMIM24
LOC149703
CRP
LECT2
IGK///IGKC
ACOT12
PCK1
C1S
TAT
NR1I2
HPR///HP
MBL2
SLC51A
HAO1
BCHE
A1BG
SAA2-SAA4///SAA2///SAA1
ABCA8
SAA2///SAA1
PON1
ALDH8A1
HSD11B1
OTC
CYP1A1
MIR8071-2///MIR8071-1///IGHV4-31///IGHM///IGHG2///IGHG1
IGLC1
IGLV1-44
CYAT1///IGLV1-44///IGLC1
AQP9
SDS
S100A8
SERPINC1
UGT3A1
FMO3
SLC22A7
INS-IGF2///IGF2
LUM
CPS1

## Sheet: GSE84402+DOWN
down-regulated genes in GSE84402
CLEC4M
CLEC4G
OIT3
LINC01554
ABCA8
FCN3
CYP2A6
FAM65C
TTC36
VIPR1
STAB2
FOSB
DNASE1L3
CYP1A2
APOF
FOS
CFP
ANGPTL1
FCN2
MT1G
GLS2
GBA3
FAM134B
LCAT
CLEC1B
ANGPTL6
KCNN2
CXCL14
GLYAT
HGF
MARCO
CYP39A1
MT1X
KLKB1
HSD11B1
SHBG
CDH19
GPM6A
CCBE1
HHIP
ANXA10
BMPER
C8A
MT1M
TMEM27
MAN1C1
GYS2
AKR1D1
PVALB
HAMP
NR1I2
INMT
MT1F
PLAC8
CYP2B6
C7
KMO
MOGAT2
ADRA1A
GREM2
MT1H
GCGR
LIFR
NAT2
SLC22A1
CYP2A7
CNDP1
MT1HL1
TAT
C3P1
BCO2
CRHBP
MT1E
TBXA2R
GSTZ1
KCND3
SORL1
TDO2
HAO2
CPED1
ADH1B
CYP4A11
EGR1
ESR1
SLC25A47
CYP4A22///CYP4A11
GNMT
PLG
PTGER2
HGFAC
LINC01093
STEAP4
CDA
CTNNA3
PCDH9
F9
DBH
ALPL
DPT
GPD1
CYP2C8
SRPX
FAM150B
LINC00844
PON1
HEPN1///HEPACAM
SRD5A2
ALDH8A1
NPY1R
AZGP1P1///AZGP1
CYP2B7P///CYP2B6
ITIH4
MT2A
HPX
MFSD2A
AKR7A3
ADH1C
SLC27A5
MOGAT1
PHYHD1
LOC100287413///GLYATL1
FLJ22763
FOLH1B
BBOX1
SDS
NGFR
NAPSB
BCHE
C1R
SLC16A4
ASPG
C9
SLC10A1
TSLP
PON3
VMO1
LYVE1
TMEM45A
PAMR1
MME
BLOC1S1-RDH5///RDH5
FETUB
TIMD4
CYP4F2
PGLYRP2
DCN
TMEM100
GNA14
CYP3A4
MUC6
ACMSD
TPPP2
APOC4-APOC2///APOC4///APOC2
SPATA18
AVPR1A
ALDOB
CYP8B1
KBTBD11
CD5L
GHR
P3H2
CTH
CFHR4
ETNPPL
SLC46A3
ACSM5
MASP2
RCAN1
AADAT
AGXT2
LEPROT///LEPR
RBP5
CXCL2
THRSP
MYOT
CYP2C9
LOC149703
CYP26A1
C6
CETP
PDGFRA
PDE2A
FBP1
SERPINE1
IGF1
ZG16
LOC105378749
ACADL
OGDHL
RSPO3
NR2F2-AS1
ST3GAL6
PBLD
SPRY4-IT1
RDH16
DCDC5///DCDC1
SLCO1B3
SIGLEC11
LOC157273
LOC101928916///NNMT
PCK1
AFM
MFAP4
ABCB11
LPA
SAA2-SAA4///SAA4
TACSTD2
DNM3OS
ADH4
FMO2
ADAMTS2
MFAP3L
SLITRK6
PTPRD
SLC28A1
ST6GAL2
SLC4A4
CPEB3
FNDC5
ART4
IGHA2///IGHA1///IGH
RTP3
IL33
COL6A6
CYP1A1
PLGLB1///PLGLB2
ABCA6
DNALI1
HPR
NR3C2
IDO2
PZP
DIRAS3
IGHM
ASPA
HPD
CLRN3
APOA5
PPBP
GGT5
BHMT
PPP1R3B
XDH
HBA2///HBA1
HAL
CNTN3
ZNF385B
ADRA1B
ANK3
JCHAIN
ABCB4
SCN7A
NPW
SMIM24
HAND2-AS1
GAS1
AQP4
FMO3
OLFM1
HSD17B6
EPHX2
LECT2
HPGD
EPHA3
PTGS2
BMP5
MIR6778///SHMT1
WFDC1
CFHR3
CDHR5
SLC1A1
UGT2B15
CCL21
ACSM3
C2orf40
PDK4
GRAMD1C
COL4A3
PFKFB1
C8orf46
AQP9
CFAP70
UBXN10
TFPI2
IYD
UPB1
IGKC
ITLN1
UPP2
MYRIP
CRYAA
ECHDC3
PRG4
SLC51A
SAA2///SAA1
CFHR5
PIGR
CFTR
TNFRSF17
SAA2-SAA4///SAA2///SAA1
SEC14L2
MROH2A
IGLJ3///IGLV1-44///CKAP2///IGLV@///IGLC1
ADIRF
IGK///IGKC
LUM
IGKV1OR2-108
