# Supplementary material for: The bioinformatics and experimental analysis of the novel roles of virus infection-associated gene CDC20 for prognosis and immune infiltration in hepatocellular carcinoma
Source: Aging (Albany NY). 2022 May 27;14(10):4513–29. doi: 10.18632/aging.204093 (PMC9186757; doi:10.18632/aging.204093)
Supplement: Supplementary Table 4 [file aging-14-204093-s004.xlsx]

## Sheet: 工作表1
Supplementary Table 4. CDC20 associated co-expressed molecules in hepatocellular carcinoma.
Gene	Log Ratio	p-Value	expression
KIF2C	2.75	3.72e-13	Altered group
RAD54L	2.51	9.08e-12	Altered group
CDC20	3	9.99e-12	Altered group
MYBL2	2.82	3.37e-11	Altered group
BIRC5	2.67	6.59e-10	Altered group
HEPN1	-3.02	2.33e-08	Unaltered group
IGF2BP3	2.86	1.07e-07	Altered group
ESR1	-2.81	1.11e-07	Unaltered group
CYP3A4	-5.47	1.16e-07	Unaltered group
ZIC5	2.53	1.97e-07	Altered group
HEPACAM	-3	3.47e-07	Unaltered group
C7	-3.24	4.93e-07	Unaltered group
LSP1P5	2.7	3.057e-06	Altered group
ISL2	2.62	4.655e-06	Altered group
HPD	-4.95	6.381e-06	Unaltered group
LIN28B	4.15	8.981e-06	Altered group
UBE2QL1	-2.77	1.026e-05	Unaltered group
CYP1A2	-3.12	1.094e-05	Unaltered group
PKIB	2.78	1.168e-05	Altered group
SRD5A2	-2.77	1.449e-05	Unaltered group
TERT	2.66	1.697e-05	Altered group
CLDN2	-3	2.101e-05	Unaltered group
SLC22A1	-3.68	2.109e-05	Unaltered group
CYP26B1	2.61	2.127e-05	Altered group
PFKFB1	-2.97	3.326e-05	Unaltered group
PITX1	3.12	3.444e-05	Altered group
SLC1A2	-2.77	3.997e-05	Unaltered group
TAT	-3.99	4.086e-05	Unaltered group
PKIA	2.77	4.457e-05	Altered group
SLC27A5	-2.52	5.021e-05	Unaltered group
COL24A1	2.7	5.573e-05	Altered group
OGDHL	-2.66	6.05e-05	Unaltered group
APOC4	-3.01	6.291e-05	Unaltered group
SCUBE1	-2.81	6.502e-05	Unaltered group
TFF2	3.27	7.015e-05	Altered group
MOGAT2	-2.65	8.47e-05	Unaltered group
HGFAC	-3.29	8.769e-05	Unaltered group
PCK1	-4.29	9.67e-05	Unaltered group
CYP8B1	-3.86	9.872e-05	Unaltered group
SLC10A1	-4.2	0.0001005	Unaltered group
EYA4	2.87	0.0001007	Altered group
LINC01018	-3.45	0.0001131	Unaltered group
CA9	3.71	0.0001189	Altered group
CYP2C8	-3.42	0.0001331	Unaltered group
CYP3A7	-3.05	0.0001464	Unaltered group
LINC02893	2.73	0.0001539	Altered group
ADH1B	-3.81	0.0001662	Unaltered group
AQP9	-2.96	0.0001869	Unaltered group
NOTUM	-3.11	0.0001968	Unaltered group
RCOR2	2.58	0.0001989	Altered group
LINC01139	2.99	0.0002007	Altered group
ADH1C	-3.05	0.0002021	Unaltered group
APOA5	-3.09	0.0002098	Unaltered group
LINC02870	2.67	0.0002113	Altered group
LECT2	-4.14	0.0002226	Unaltered group
CFHR4	-2.97	0.0002546	Unaltered group
RTP3	-3.16	0.0002728	Unaltered group
MEP1A	3.14	0.0002815	Altered group
IGF2BP1	2.78	0.0002931	Altered group
ASPDH	-2.93	0.0003058	Unaltered group
EYA1	2.64	0.0003081	Altered group
SLC25A47	-3.42	0.0003141	Unaltered group
HSD11B1	-3.2	0.0003228	Unaltered group
MCOLN3	2.54	0.0003387	Altered group
G6PC1	-3.55	0.0003589	Unaltered group
CTAG1B	3.73	0.0003591	Altered group
SPP2	-3.97	0.0003668	Unaltered group
POPDC3	3.31	0.0003812	Altered group
GLYAT	-3.67	0.0003867	Unaltered group
SLC13A3	-2.92	0.0003877	Unaltered group
CA5A	-3.04	0.0004057	Unaltered group
CLEC2L	3.08	0.00042	Altered group
ADH4	-4.23	0.0004296	Unaltered group
CYP2E1	-3.31	0.000446	Unaltered group
GRIK2	2.91	0.0004634	Altered group
SEMA3E	3	0.0005232	Altered group
CTAG2	4	0.0005319	Altered group
PNCK	2.95	0.0006123	Altered group
VCX3A	3.16	0.000643	Altered group
AKR1D1	-3.01	0.0006463	Unaltered group
THRSP	-3.09	0.0006476	Unaltered group
PAH	-2.97	0.0006502	Unaltered group
ABCB11	-2.67	0.0007409	Unaltered group
GABRA2	2.6	0.0007467	Altered group
MAGEA6	3.68	0.0007548	Altered group
TMPRSS15	3.62	0.0008476	Altered group
SLC22A7	-3.31	0.0008714	Unaltered group
EFNA5	2.51	0.0008906	Altered group
CYP2C9	-2.94	0.0008951	Unaltered group
MASP2	-2.67	0.0009271	Unaltered group
IYD	-2.53	0.0009295	Unaltered group
CYP4A22	-2.71	0.001055	Unaltered group
AFM	-2.93	0.00117	Unaltered group
GPLD1	-2.55	0.001215	Unaltered group
CYP2A6	-4.11	0.001237	Unaltered group
CYP4F2	-2.91	0.001239	Unaltered group
CPS1	-3.5	0.001273	Unaltered group
AGR2	3.62	0.001355	Altered group
HSD17B13	-2.9	0.001429	Unaltered group
ADH1A	-2.73	0.001499	Unaltered group
CYP4F3	-2.57	0.001532	Unaltered group
GLS2	-2.59	0.00171	Unaltered group
C4BPA	-2.57	0.001809	Unaltered group
EEF1A2	-2.72	0.00187	Unaltered group
HMGA2	3.25	0.002062	Altered group
UGT1A4	-3.08	0.002097	Unaltered group
F12	-2.85	0.002378	Unaltered group
F9	-3.13	0.002409	Unaltered group
ACSM2A	-2.56	0.002431	Unaltered group
UGT2B15	-2.55	0.002495	Unaltered group
UCHL1	3.13	0.00259	Altered group
CYP4A11	-2.87	0.002627	Unaltered group
SERPINC1	-2.95	0.002681	Unaltered group
APCS	-2.56	0.00282	Unaltered group
GAGE4	2.91	0.002833	Altered group
GAGE12J	2.67	0.003326	Altered group
MAGEA3	3.09	0.00349	Altered group
DMBT1	2.68	0.00355	Altered group
CCL16	-2.53	0.003561	Unaltered group
SLC6A15	2.75	0.00368	Altered group
S100P	2.77	0.003869	Altered group
ALDOB	-2.71	0.004322	Unaltered group
OTC	-2.64	0.004873	Unaltered group
UROC1	-2.65	0.005681	Unaltered group
SLC7A10	2.51	0.00578	Altered group
SULT2A1	-2.59	0.006007	Unaltered group
CYP7A1	-2.59	0.006725	Unaltered group
PEG10	2.52	0.006861	Altered group
NTS	2.71	0.008721	Altered group
GAGE12D	2.89	0.008875	Altered group
GAGE2D	2.98	0.009286	Altered group
CYP2A7	-2.51	0.0114	Unaltered group
XAGE1B	3.03	0.0118	Altered group
MAGEA2	2.52	0.0122	Altered group
HRG	-2.65	0.0141	Unaltered group
PRAME	2.71	0.0162	Altered group
COL2A1	2.51	0.0197	Altered group
